# Decoding Plant–Environment Interactions That Influence Crop Agronomic Traits

Keiichi Mochida <sup>1,2,3,4,\*</sup>, Ryuei Nishii<sup>5</sup> and Takashi Hirayama<sup>4</sup>

<sup>1</sup>RIKEN Center for Sustainable Resource Science, Tsurumi-ku, Yokohama, Japan

<sup>2</sup>Kihara Institute for Biological Research, Yokohama City University, Totsuka-ku, Yokohama, Japan

<sup>3</sup>Graduate School of Nanobioscience, Yokohama City University, Kanazawa-ku, Yokohama, Japan

<sup>4</sup>Institute of Plant Science and Resources, Okayama University, Kurashiki, Japan

<sup>5</sup>School of Information and Data Sciences, Nagasaki University, Nagasaki, Japan

\*Corresponding author: E-mail, keiichi.mochida@riken.jp; Fax, +81-45-503-9609.

(Received 31 January 2020; Accepted 26 April 2020)

To ensure food security in the face of increasing global demand due to population growth and progressive urbanization, it will be crucial to integrate emerging technologies in multiple disciplines to accelerate overall throughput of gene discovery and crop breeding. Plant agronomic traits often appear during the plants' later growth stages due to the cumulative effects of their lifetime interactions with the environment. Therefore, decoding plant–environment interactions by elucidating plants' temporal physiological responses to environmental changes throughout their lifespans will facilitate the identification of genetic and environmental factors, timing and pathways that influence complex end-point agronomic traits, such as yield. Here, we discuss the expected role of the life-course approach to monitoring plant and crop health status in improving crop productivity by enhancing the understanding of plant–environment interactions. We review recent advances in analytical technologies for monitoring health status in plants based on multi-omics analyses and strategies for integrating heterogeneous datasets from multiple omics areas to identify informative factors associated with traits of interest. In addition, we showcase emerging phenomics techniques that enable the noninvasive and continuous monitoring of plant growth by various means, including three-dimensional phenotyping, plant root phenotyping, implantable/injectable sensors and affordable phenotyping devices. Finally, we present an integrated review of analytical technologies and applications for monitoring plant growth, developed across disciplines, such as plant science, data science and sensors and Internet-of-things technologies, to improve plant productivity.

**Keywords:** Genome to phenome • Life-course approach • Multi-omics • Plant phenomics • Sensor.

## Introduction

By 2050, the human population estimated at 9.8 billion will require 25–70% more food than is currently consumed. Innovation in the current global food system is crucial to

cope with this significantly increased demand and ensure that the population is fed nutritiously in a sustainable and profitable manner. In 2009, the World Economic Forum partners launched the New Vision for Agriculture as a part of a system initiative on Shaping the Future of Food Security and Agriculture, aiming to improve global food security, environmental sustainability and economic opportunity (<https://www.weforum.org/projects/new-vision-for-agriculture/>). Recently, this initiative presented scenarios through the analysis of the two most critical uncertainties—demand shift and market connectivity—and suggested that today's food systems have to be overhauled to develop an efficient, sustainable, inclusive and nutritional food system for feeding future global populations (<https://www.weforum.org/whitepapers/shaping-the-future-of-global-food-systems-a-scenarios-analysis>).

In strengthening food security, several emerging trends pose both challenges and opportunities. Economic and population growth and rapid urbanization have been changing regional and global food consumption patterns. As shown in the 2017 Global Nutrition Report, the multiple burdens of malnutrition, including undernourishment (calorie deficiency), micronutrient (vitamin and mineral) deficiency and overnourishment [obesity and overweight, leading to diet-related noncommunicable diseases (NCD)], have been major challenges in food security and preventive health care (<https://globalnutritionreport.org/reports/2017-global-nutrition-report/>). Moreover, degradation of soil and water resources in the agri-food sector pose risks to crop production, which is expected to enhance the adverse effect on livelihoods and food security resulting from climate change (Pastor et al. 2019). However, emerging technologies, including plant science, data science and sensors (as part of the so-called Internet of things, or IoT), present opportunities to address these challenges through data-driven innovations in crop breeding, precision agriculture and 'smart farming'.

To address the challenge of global food security through crop breeding, it will be imperative to integrate emerging technologies in multiple disciplines and revitalize the overall throughput of gene discovery. Therefore, in this mini-review,

we aim to summarize recent advances in two major disciplines—multi-omics analysis and plant phenomics technologies—while emphasizing the potential of the life-course approach for monitoring health status in plants and crops throughout their lifespans. Specifically, we describe the recent advances in analytical technologies for monitoring health status in plants, including multi-omics-based approaches to monitor physiological status (highlighting strategies to integrate heterogeneous datasets from multiple omics areas) and phenomics techniques to noninvasively and continuously monitor plant growth (highlighting emerging technologies in spectroscopy, implantable sensors and affordable devices).

### Assessing Plant–Environment Interactions over Time

#### Applying the life-course approach to plant studies

The life-course approach is an interdisciplinary study method to elucidate the relationships between earlier experiences at the beginning of life and later outcomes and well-being (Kuh et al. 2003, Halfon and Forrest 2018). In human epidemiology, the time dependency of risk factors with respect to later outcomes is a profound concept of the life-course approach, in which the longitudinal effects of such factors is often described using the concepts of timing, trajectory, transition and turning point. The approach aims to identify causal relationships between risk factors (and modifying or mediating factors) and their impacts on outcomes over time, with the causalities described using three basic conceptual models—the critical period model, the accumulation model and the pathway (chain of risk) model—and their variants (Kuh et al. 2003). The causal relationships between factors are inferred by statistical methods of causal inference, such as structural equation modeling (Warrington et al. 2019) and Bayesian inference (Madathil et al. 2018), and are often represented with a directed acyclic graph.

In human epidemiology, the life-course approach has been used to investigate biological, behavioral and psychosocial processes from gestation to adult, aiming to identify the risks and protective factors, as well as their timing and pathways, that independently or cumulatively and interactively affect chronic diseases and health outcomes in later life (Ben-Shlomo and Kuh 2002, Kuh et al. 2003, Kuh and Ben-Shlomo 2004). Specifically, life-course epidemiological studies have demonstrated that environmental exposure during earlier developmental stages can affect later pathophysiological processes, which advanced the understanding of the biological mechanisms underlying the Developmental Origins of Health and Disease approach to assess the risk factors of NCD (Hanson and Gluckman 2014, Haugen et al. 2015). With the advent of the personal genome-sequencing era (Goldfeder et al. 2017, Stark et al. 2019), coupled with digitally based transformational advances in health care and medicine, the life-course approach has attracted attention as a way to elucidate the interactions between genetic and socio-environmental factors underlying complex diseases (Halfon and Forrest 2018). Improved understanding of these interactions is expected to provide preventive

and precision medicine strategies in personalized health care (Scott et al. 2019).

In crop farming, agronomically important traits of plants often appear during the later growth stage and thus are significantly affected by the cumulative effects of plant–environment interactions over the growth period (Mochida et al. 2015). This naturally led us to consider applying the life-course approach in plants and crop varieties to explore the relationship between their temporal physiological response to environments across growth stages as a means to identify factors in the contexts of timing, trajectories, transitions and pathways that influence complex end-point traits such as yield, facilitating the identification of genotype-to-phenotype or genome-to-phenome (G2P) relationships in crop species (Fig. 1).

#### Time-dependent description of plant growth

Time-series observations of biological phenomena are a primary approach to elucidate causal relationships between factors and later outcomes along the life-course in plants. Living organisms are open systems in which biological phenomena continuously change over time and interact with external factors (Von Bertalanffy 1950), and they are thus often described as state-transition systems, a model that is useful for understanding the causalities of biological consequences, such as development, growth, disease and adaptation. Time-series observations of plant physiological responses to environmental changes have revealed molecular mechanisms underlying fairly immediate responses to abiotic and biotic stresses (Withers and Dong 2017, Fichman and Mittler 2020), as well as longer responses to ambient environments throughout lifespans, such as seasonal adaptation (Nagano et al. 2019), stress memory and acclimation (Crisp et al. 2016, Chun et al. 2019). Moreover, recent time-series physiological studies in various plant species have demonstrated that longer physiological responses often depend on genetic variations, as well as on plant age and stage (Hara et al. 2019, Ohnishi et al. 2019). Since plants are exposed to multiple and recurring stresses, they balance resource investment through leaf-age-dependent stress-response prioritization to cope with combined stresses and to maintain growth and reproduction (Berens et al. 2019), reacting appropriately to both environmental and developmental signals to ensure survival and reproductive success. Recent studies have illustrated that these well-coordinated plant responses to the environment are actualized through cross-talk between plant hormones mediated by elaborate signaling networks (Caarls et al. 2016, Shu et al. 2018, Yang et al. 2018, Itoh et al. 2019), which are often genetically diversified through intraspecific variations (Nam et al. 2017). These findings from time-series physiological studies demonstrate that multi-omics studies can be used to explore novel relationships between molecules fluctuating in response to environmental changes across multiple omics areas.

#### Emerging omics areas that facilitate understanding physiological responses in plants

Coupling with innovative analytical techniques, multi-omics studies have been popular for characterizing complex biological phenomena, and new omics areas have also emerged that

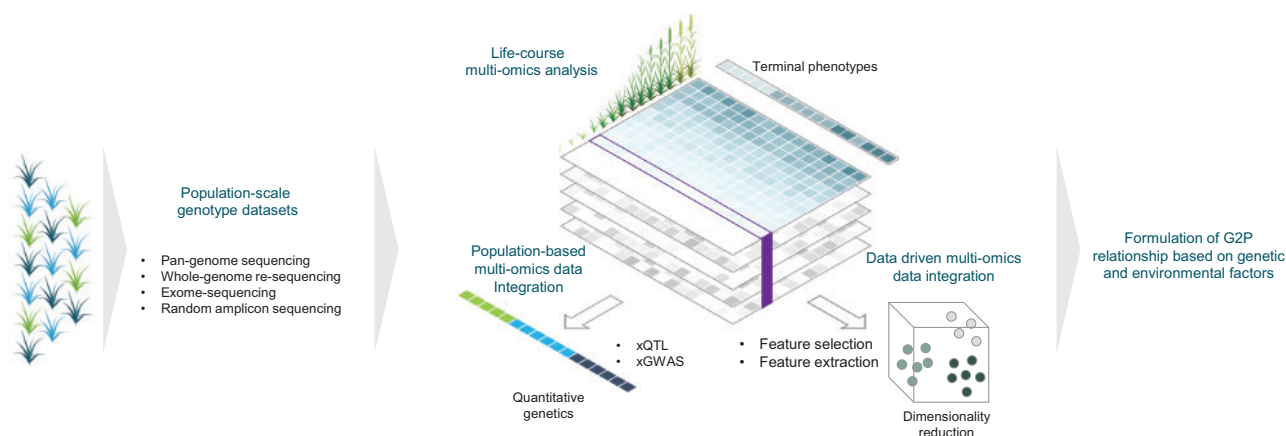

**Fig. 1** Life-course approach in crops for the formulation of genotype–phenotype relationships (G2P). Population-scale genotype datasets are obtained through genome-sequencing applications, such as pan-genome sequencing, whole-genome re-sequencing, exome sequencing and random amplicon sequencing. Physiological changes in crops are monitored using omics analyses throughout the life courses of a crop species. Multiple omics datasets are integrated by population-based approaches with quantitative genetics and data-driven approaches through strategies for dimensionality reduction.

facilitate the understanding of plant physiological responses. The early success of combinatorial approaches using multiple omics datasets has demonstrated the advantages of describing the states of biological phenomena based on multifaceted omics areas, as compared with single-omics-based approaches (Mochida and Shinozaki 2010, 2011). Multi-omics analysis has been applied to address biological phenomena observed in diverse plant species.

For example, the combinatorial approaches of shotgun proteomics and RNA sequencing-based transcriptomics were used to study shikonin biosynthesis in *Lithospermum erythrorhizon* (Takanashi et al. 2019). Combinatorial approaches based on genome-scale methylation profiling (methylome) and transcriptome analysis were also applied to study molecular systems underlying sex conversions in persimmon (Masuda et al. 2020), flower bud formation in apple (*Malus domestica* Borkh.) (Xing et al. 2019) and physiological responses in *Arabidopsis* (*Arabidopsis thaliana*) roots under zinc deficiency (Chen et al. 2018b). Emerging new omics areas coupled with innovative analytical techniques have enabled the illumination of new molecular spaces, as in lipidomics (Brügger 2014) and ionomics (Huang and Salt 2016).

Lipidomics, a focused sub-area of metabolomics that provides a comprehensive characterization of the lipids in organisms, has shed light on the metabolism and diversity of the plant lipidome (Horn and Benning 2016). In plants, lipidome profiling has facilitated the analysis not only of oil-related traits (Oenel et al. 2017) but also of physiological responses to the environment through remodeling, signaling and oscillation of membrane lipids (Nakamura 2018, Perlikowski et al. 2020). In maize (*Zea mays*), population-scale lipidome profiling combined with transcriptome analysis of a recombinant inbred line population revealed genetic factors associated with oil concentration and composition in the maize kernel (de Abreu et al. 2018), and mass spectrometry imaging-based lipid profiling illustrated the anatomical distribution of lipids, and its genetic diversity, in maize leaves (Duenas et al. 2017).

Ionomics, which focuses on the total elemental composition of organisms, has been important for elucidating the regulatory mechanisms of mineral homeostasis in plants, including uptake, transport, utilization and storage, as well as how those change in response to environmental constraints (Huang and Salt 2016). For example, ionome profiling of 19 elements in a diverse panel of maize varieties grown under different phosphorus levels and symbiotic conditions demonstrated the variety-specific effect of symbiosis with the arbuscular mycorrhizal fungus *Funneliformis mosseae* on the maize ionome (Ramirez-Flores et al. 2017). A combinatorial approach using ionome and transcriptome profiling recently illustrated plastic systems for mineral transportation in response to different soil water conditions in rice (Wang et al. 2020). In addition to organ-specific nutrient sensing, the mineral-nutrient-related long-distance signaling networks between organs have also been attracting attention as researchers work to elucidate the nutrient cross-talk that occurs during physiological responses to environmental changes in plants (Ruffel 2018).

Moreover, the development of analytical high-throughput sequencing techniques with improved affordability, throughput and multiplexing and sensitivity has provided time-, spatially- and single-cell-resolved transcriptomic and epigenomic analyses, which reveal the cellular heterogeneity and cell-type-specific states of the transcriptome and chromatin, respectively (Lee et al. 2019, Ryu et al. 2019, Torii et al. 2020). Strategies for identifying associations between omics datasets may be roughly classified into quantitative genetics-based approaches and data-driven approaches. On the one hand, quantitative genetics-based approaches have allowed us to explore the genetic association and/or linkage between genome-scale variation data and omics profiles used as a series of quantitative traits (Hasin et al. 2017). On the other hand, the data-driven approaches, which are further classified into supervised and unsupervised methods (Huang et al. 2017), have helped us identify biomarkers, molecular networks and molecular signatures that represent hallmarks of complex biological



phenomena. These emergent omics areas have generated new data layers that facilitate the representation of physiological responses to environmental changes and the reconstruction of biomolecular networks across multiple omics data layers.

### Population-scale omics data for G2P modeling

Population-scale applications of multi-omics studies have provided invaluable resources to identify omics-based features that now-cast and forecast biological states, as well as genetic and environmental factors to model G2P relationships. In the medical sciences, population-scale omics data resources have been developed through coordinated projects. The Cancer Genome Atlas program (Cancer Genome Atlas Research Network 2013) is a comprehensive, coordinated project that provides an information resource comprising over 2.5 PB of genomic, epigenomic, transcriptomic and proteomic datasets and is significantly improving the understanding of cancer genetics and its application in clinical approaches. Specifically, the large-scale cancer data have enabled the development of machine-learning-based predictive models that facilitate the prediction of cancer progression (Kourou et al. 2015, Chaudhary et al. 2018), the classification of cancer subtype discovery (Gao et al. 2019) and the identification of useful biomarkers (Way et al. 2018). The Tohoku Medical Megabank Project is a large-scale project that facilitates multi-omics cohort studies aimed to advance personalized health care and precision medicine through association studies, such as metabolome and genome-wide association studies (Koshiba et al. 2018).

In plants, population-scale sequencing has been used to decipher variations in genetic codes, generating genomic resources that are useful in identifying G2P relationships. In Arabidopsis, in addition to the whole-genome re-sequencing datasets and variation map of 1,135 natural inbred lines (The 1001 Genomes Consortium 2016), the 1001 Epigenomes Project developed methylomes for 1,028 accessions and transcriptomes for 998 accessions (Kawakatsu et al. 2016). In some cereal crops, population-scale sequencing projects have provided genome-scale intraspecies variation datasets: e.g. pan-genome sequencing of 3,010 diverse Asian rice cultivars (Wang et al. 2018a), whole-genome re-sequencing of 302 soybean accessions (Zhou et al. 2015), pan-transcriptome sequencing of 503 maize accessions (Hirsch et al. 2014) and exome sequencing of 267 accessions and genotype-by-sequencing of 22,626 accessions in barley (*Hordeum vulgare*) (Russell et al. 2016, Milner et al. 2019). In crops, these genome-scale variation resources of diverse accessions facilitate genomic research and breeding through the understanding of G2P relationships. Moreover, investigations of host–microbe interaction have attracted attention to the association between microbiota and human health (Llorens-Rico and Raes 2019), as well as crop varieties and their agricultural outcomes (Toju et al. 2018). Recent longitudinal studies of host organisms and their associated microbiomes have revealed temporal shifts in human microbiomes related to human diseases, such as inflammatory bowel diseases (Zuo and Ng 2018) and Type 2 diabetes mellitus (Zhou et al. 2019),

and in soil microbiomes associated with plant–pathogen interactions (Wei et al. 2019).

Population-based approaches with quantitative genetics have made it possible to explore the genetic associations and/or linkages between genome-scale variation data and omics profiles as a series of quantitative traits (Hasin et al. 2017). The Genotype-Tissue Expression project aims to develop a comprehensive resource to study tissue-specific gene expression and regulation based on datasets from nearly 1,000 people (<https://gtexportal.org/home/>). In plants, metabolome analyses have been widely applied to identify genetic linkages with metabolite profiles (mQTL analysis) accumulated in crops, such as tomatoes (Tohge and Fernie 2015), rice (Chen et al. 2018a) and maize (Li et al. 2019a), and they were recently used to explore the genetic association between population-wide variations and metabolite profiles (mGWAS) (Luo 2015, Fang and Luo 2019), superimposed on genetic loci associated with agronomic traits (Chen et al. 2016). The continual increases in the affordability of sequencing have accelerated the accumulation of static genome-sequencing data, as well as high-dimensional transcriptome, epigenome and microbiome data, posing challenges related to the development of strategies to extract features that well describe biological phenomena, without being defeated by the intrinsic complexity, dimensionality and modality of such datasets.

### Dimensionality reduction in high-dimensional omics datasets

Dimensionality reduction and selection of informative features from omics datasets are often critical to integrating heterogeneous and high-dimensional datasets from multiple omics areas. Dimensionality reduction, the transformation of high-dimensional data to low-dimensional space, involves critical preprocessing steps that are usually performed before model-based data mining of high-dimensional data. Since omics data usually contain a large number of variables compared to the limited number of observations or samples obtained in a standard biological experiment, it is common to encounter roadblocks in handling omics datasets: e.g. high dimensionality, which leads to assorted challenges; noisy attributes; and correlated attributes, which require more computing resources and negatively influence modeling accuracy. Therefore, to represent data with fewer features, the techniques of selection of a set of informative features (feature selection) and transformation of original features into a smaller number of new features (feature extraction) are used to identify informative features for dimensionality reduction, aiding the interpretation of high-dimensional data through visualization in ideal lower-dimensional space. Owing to the sparseness common in biological networks, such as gene regulatory networks (GRNs) (Koda et al. 2017) and microbial communities (Raman et al. 2019), statistical approaches based on the sparse estimation have been used for feature selection and for transforming features from multiple data types into fewer factors, facilitating the identification of key features, such as key regulatory genes in GRNs and biomarker candidates useful for diagnostics (Moon and Nakai 2018).

Multivariate analysis-based methods, such as partial least-squares regression, can provide efficient strategies to extract features from multi-omics data, which often contains many correlated variables, through projected latent features. For example, mixOmics is an integrated package providing a framework for multi-omics data integration for the identification of biomarkers and molecular signatures with such multivariate analysis-based methods (Rohart *et al.* 2017), which was used to integrate xylem transcriptome, metabolome and woody traits in *Eucalyptus* (Ployet *et al.* 2019). Moreover, the encoder–decoder architecture of convolutional neural networks, widely used for deep learning, enables the extraction of features from multiple sets of input features with encoding layers. Recently, this autonomous feature extraction has been applied to develop predictive models for clinical diagnosis, providing perspectives in precision medicine (Kalinin *et al.* 2018), and in systems biology in plant–microbe interaction (Mishra *et al.* 2019). Such feature extraction from high-dimensional multi-omics data is useful for dimensionality reduction, as well to help identify integrated features across multiple omics areas that can help generate plausible biological assumptions underlying complex traits.

### Growth and physiological monitoring and diagnostics in crops

Accurate and continuous detection of morphological and physiological changes in crops throughout their lifespans is an essential approach to assessing their genetic improvements from breeding programs and to improving management practices in farming. To enhance crop productivity, recent advances in sensor technologies, robotics and automation technologies and signal and image analytics have been widely implemented as frameworks for crop breeding and management. Plant phenomics is an interdisciplinary area aimed at understanding plant genotype–phenotype relationships, which is used to focus crop breeding strategies through the exploration of genetic associations between genome-scale genetic variations and large-scale phenotype datasets from high-throughput frameworks used to monitor plant growth (Yang *et al.* 2013, Tardieu *et al.* 2017, Araus *et al.* 2018). Precision agriculture utilizes a range of applications, including field mapping, crop scouting and yield monitoring, as management strategies to improve crop yield, operational efficiency and profitability in farming. Here, we review recent methodology advances and platforms for crop monitoring and diagnosis, which may offer new avenues for crop breeding and precision agriculture.

### Plant phenomics platforms

Plant phenotyping systems enable large-scale, high-throughput, noninvasive, real-time and continuous acquisition of growth and physiology data from plants throughout their lifespans. For simultaneous acquisition of spatial and temporal data from plants and the ambient environment, plant phenotyping systems usually incorporate sensors into mobility systems, such as tray conveyors, unmanned aerial vehicles (UAVs), unmanned ground vehicles and motorized gantries, along with software for communication, computing and data management (Mochida

*et al.* 2019). Automated plant phenotyping platforms have been established that enable high-throughput and noninvasive two-dimensional (2D)-image-based trait quantification from aerial images of plants grown under controlled conditions, and these are widely used for time-lapse monitoring of plant growth to identify growth phenotypes in mutants (Arvidsson *et al.* 2011) and natural accessions (Feng *et al.* 2017) and phenotypes in response to environmental stresses (Granier *et al.* 2006, Dhondt *et al.* 2014, Clauw *et al.* 2015, Humplik *et al.* 2015). Plant phenotyping systems with automatic watering and rotation systems for individual pots provide higher spatial homogeneity, improving experimental reproducibility and allowing the precise monitoring of plant responses to soil and water conditions (Fujita *et al.* 2018).

### Three-dimensional plant phenotyping

Recently, three-dimensional (3D) scanning and imaging techniques have been applied in plant phenotyping, making it possible to identify and monitor geometric parameters in plant growth and traits. As 3D imaging is more robust than conventional 2D imaging with respect to occlusion due to overlapping plants and organs, plant phenotyping based on 3D imaging has recently attracted attention as a way to monitor plant architectures. As recently reviewed (Paulus 2019), 3D-imaging-based plant phenotyping has been extended to various crop species, traits and scales, with new developments including optical distance measurement techniques for 3D reconstruction, as well as improvements to sensor accuracy. Notably, 3D reconstruction methods are mainly classified into two types: active-based methods with 3D sensors for real-time depth measurements, such as light detection and ranging, structured light and time-of-flight sensors, and passive-based methods with photogrammetry for 3D modeling, such as stereovision and structure from motion. In field-scale crop phenotyping, 3D sensors have been incorporated into mobile platforms, such as mobile robots (Qiu *et al.* 2019) and tractors (Jiang *et al.* 2018, Wang *et al.* 2018b), and are used to phenotype geometric traits, such as plant height, above-ground biomass and growth rate. Photogrammetry-based 3D modeling is often carried out using UAV-based platforms for remote sensing and is widely used in field-scale crop phenotyping (de Castro *et al.* 2019, López-Granados *et al.* 2019). Moreover, 3D information about the physical shape of plants is combined with 2D images synchronously acquired by sensors, such as hyperspectral, multispectral, thermal and near-infrared (NIR) cameras, improving our understanding of the spatial and temporal relationship between plant morphological and physiological parameters.

### Phenotyping in plant roots

Often termed ‘the hidden half’ of plants (Eshel and Beeckman 2013, Atkinson *et al.* 2019), plant roots are at the frontier of plant science and crop breeding, as recent work has drawn attention to fact that their structure, anatomy, function and interactions with soil conditions greatly influence plant productivity (Bishopp and Lynch 2015, Downie *et al.* 2015, Ryan *et al.* 2016). The identification of root-related traits and their genetic control can be a promising strategy to increase agricultural

yields of crops (Bray and Topp 2018). As reviewed in Atkinson et al. (2019), techniques for nondestructive plant root phenotyping have emerged based on 3D imaging techniques, such as MRI, X-ray computed tomography (CT) and positron emission tomography. Time-series data collection using these 3D imaging techniques permits spatial and temporal four-dimensional measurements, making it possible to quantify root growth (van Dusschoten et al. 2016, Jiang et al. 2019). Transparent rhizosphere imaging with transparent soil or rhizotrons (such as rhizotron plates and rhizotron tubes) allows the use of red–green–blue color and hyperspectral sensors to evaluate physiological states of plant root–microorganism interactions (Bodner et al. 2018, Ma et al. 2019). In phenotyping root system architecture in the field, a widely used approach is ‘shovelomics’, which remains a labor-intensive and destructive measurement method. Therefore, automated, nondestructive data collection methods for longitudinal monitoring of root system architectural traits from crops grown under field conditions have begun to be developed (Wasson et al. 2020), with nondestructive methods, such as ground-penetrating radar (Delgado et al. 2017) and low-cost X-ray CT (<https://arpa-e.energy.gov/?q=arpa-e-programs/roots>), combined with mobile frameworks providing promising techniques for automated rhizosphere monitoring.

### Plant monitoring with implantable/injectable sensors

Nanotechnology-based flexible electronic technologies have rapidly advanced and enabled the design of wearable and implantable devices for continuous, real-time, in vivo monitoring of molecular parameters and vital signs in biomedical and healthcare applications (Ling et al. 2018). Implantable/injectable sensors have also facilitated the monitoring of physiological states in plants throughout their lifespans (Giraldo et al. 2019). In the past decade, advances in nanofabrication technologies, microfluidic technologies and flexible and biocompatible electronics have, with the emergence of the IoT paradigm, enabled the fabrication of wearable and implantable sensors and their networks, which achieve noninvasive or minimally invasive, real-time, long-term and continuous health monitoring (Han et al. 2017, Koydemir and Ozcan 2018, Byun et al. 2019, Nightingale et al. 2019). Wearable and implantable/injectable medical devices have been successfully used to measure biomedical parameters (Huang et al. 2019) and have opened up new avenues for human–machine interfaces, allowing further augmentation of human abilities (Park et al. 2018). Carbon nanomaterials, such as graphene and carbon nanotubes, have been utilized as biosensors, taking advantage of their physical, chemical and electrical properties (Oren et al. 2017, Pena-Bahamonde et al. 2018). As recently reviewed in Giraldo et al. (2019), single-walled carbon nanotube-based NIR sensors embedded in plant leaves have been used to monitor signaling molecules, such as reactive oxygen species, nitric oxide (NO), calcium, glucose and ethylene (Esser et al. 2012, Giraldo et al. 2019). In addition, graphene-based wearable sensors have been employed to monitor signals associated with water transport in plants (Oren et al. 2017). Graphene-based sensors also can be

integrated to wireless circuits (Park et al. 2016). Stretchable and vapor material-based sensors compatible with living leaf surfaces have enabled the longitudinal monitoring of slow, subtle physiological changes in plants throughout their growth periods (Kim et al. 2019, Zhao et al. 2019).

### Affordable plant phenotyping

Open-source frameworks may facilitate quick and cost-effective prototyping and customization of functions to develop affordable plant phenotyping systems. Recently, an international group of researchers reviewed the costs of components for plant phenotyping, including imaging devices and sensors and investment costs, and discussed the possible scenarios for affordable plant phenotyping (Reynolds et al. 2019). Small, affordable open-source single-board computers (SBCs) have allowed the development of ‘smart devices’ that integrate sensors and are incorporated into mobile platforms, playing a significant role in the emerging IoT paradigm. For example, the Raspberry Pi series, a widespread SBC platform, has been used to develop an affordable phenotyping system to monitor the growth of plants under controlled and field conditions (Dobrescu et al. 2017, Czedik-Eysenberg et al. 2018, Tovar et al. 2018). By combining Raspberry Pi-based sensors with open-source computer numerical control frameworks originally developed for gantry automation, Lien et al. (2019) created an affordable automated plant imaging system with a hyperspectral sensor for plant phenotyping. Phenotiki provides an image-based plant phenotyping platform that includes a Raspberry Pi-based device for plant image acquisition and software tools for image analyses (Minervini et al. 2017). In addition, several open-source software and hardware for plant image analyses exist: e.g. the Integrated Analysis Platform (<https://sourceforge.net/projects/iapg2p/>) was developed to provide an analytical pipeline of plant images (Klukas et al. 2014) implemented on the ‘PhenoBox’ platform (<https://github.com/Gregor-Mendel-Institute/PhenoBox-System>) (Czedik-Eysenberg et al. 2018) and the Phenotyping Hybrid Information System (<http://www.phis.inra.fr/openphis/web/index.php>) was proposed to manage and visualize multisource, multiscale plant phenotyping datasets (Neveu et al. 2019). Moreover, smartphone applications for point-of-care testing have burgeoned (Vashist et al. 2015, Kanakasabapathy et al. 2017) and are also used for plant disease diagnostics (Li et al. 2019b). These affordable hardware and software frameworks will promote do-it-yourself (DIY)-based phenotyping in diverse plant species, furthering our discovery of decisive developmental events, as well as of the genetic and environmental factors associated with agronomic traits in plants throughout their lifespan.

### Phenotyping of physiological responses in plants

The noninvasive and continuous monitoring of physiological responses is a major application of plant phenotyping for breeding physiological traits in crops. Photosynthesis-related traits, such as chlorophyll content, reflectance and fluorescence, have been widely used to monitor physiological states in plant species under different conditions and across genotypes (Šebela et al. 2018, van Bezouw et al. 2018, Furbank et al. 2019,

Pérez-Bueno et al. 2019). Using the dynamic environmental photosynthesis imager, a phenotyping platform that enables the simultaneous measurement of photosynthetic parameters on a number of plants under dynamic or fluctuating light conditions, Cruz et al. (2016) identified ‘emergent phenotypes’ that had not been characterized under standard laboratory conditions but are observable under progressive and dynamic illumination conditions. This finding demonstrates that continuous high-throughput phenotyping under dynamically changing conditions can facilitate the identification of highly temporal phenotypes whose observation depends on environmental conditions and developmental stages. Moreover, advances in imaging techniques, including spectroscopic modalities, imaging probes and CT, have provided new avenues for plant phenotyping through space- and time-resolved imaging. For example, using the Raman spectra of plants treated with abiotic stresses, Altangerel et al. (2017) demonstrated a relationship between anthocyanin and carotenoid levels and exposure to abiotic stress. Synchrotron radiation (SR)-based applications, such as SR-Fourier transform infrared spectroscopy and SR X-rays, can be utilized to visualize the in situ distribution of biomolecules, such as organic compounds, metals and salts, as was well reviewed by Vijayan et al. (2015). Although imaging techniques based on SR require beamline facilities and are still limited in sample types and throughput, their application would potentially facilitate examination of the ultrafast kinetics of biomolecules in response to environmental stresses in plants. Radioisotopes facilitate the visualization of mineral uptake and transport, distribution and photosynthate dynamics in plants, with the real-time radioisotope imaging system allowing the acquisition of the radiation profile images in plants (Sugita et al. 2016). Although radioisotope imaging requires specific instruments combined with a fiber-optic plate with scintillator for real-time radioisotope imaging, this can be expected to illustrate physiological responses accompanying the movement of ions and photosynthates through the plant body in response to environmental changes.

## Conclusions and Prospects

In this mini-review, we have summarized recent advances in two major areas—the combination of multi-omics analysis with life-course analysis and the frameworks for plant phenotyping—that are poised to synergistically advance our understanding of plant–environment interactions. To meet the increasing global demand for food production and environmentally sustainable intensification of agriculture, interdisciplinary approaches need to be established across plant science, sensor technology, nanotechnology, data science and IoT technology to ensure sustainable agricultural production. High-throughput sequencing techniques have provided new avenues, such as Genebank-scale genomics, that will make it possible to leverage genetic variation within a crop species and plant phenotypic data to facilitate breeding programs (Milner et al. 2019). In addition to imaging-based plant phenotyping, nanotechnology-based implantable sensors will provide techniques to continuously monitor the health status of plants, which

may provide novel insights into plant–environment interactions through longitudinal continuous monitoring of plant status with high spatiotemporal resolution (Giraldo et al. 2019). The availability of SBCs has accelerated the prototyping of affordable DIY sensors for plant phenotyping, and SBCs ready for deep learning may enable the use of artificial-intelligence-based edge computing to diagnose crop status based on continuously monitored biomarkers. The high-dimensional datasets produced by multi-omics and phenome analyses have posed challenges for interpretation, requiring the development of relevant strategies for dimensionality reduction. For example, by combining multiple sensors and omics profiles to describe physiological response to environmental conditions in depth, Perlikowski et al. (2020) recently demonstrated integrated features that were potentially related to a trait for drought-avoidance strategy in *Festuca arundinacea* through comprehensive time-series analytics, including analyses of root architecture, phytohormones, proteome, primary metabolome and lipidome under progressive stress conditions. During the last decade, convolutional deep neural networks have been widely used in computer vision applications, enabling the extraction of informative features from multimodal datasets, such as multi-omics data and medical images, for use in now-casting and forecasting human health status for personalized healthcare and precision medicine. This approach may further facilitate the extraction of features from data ranging from genome to phenome datasets even in crop varieties. These advances in analytical techniques will provide a framework to digitize plant–environment interaction data and monitor plant health status, thereby facilitating crop breeding, precision agriculture and smart farming to achieve global food security.

## Funding

Grant-in-Aid for Scientific Research (C) [19K11861 to K.M. and R.N.] of the Japan Society for the Promotion of Science (JSPS) and JST CREST [JPMJCR16O4 to K.M. and T.H.].

## Disclosures

The authors have no conflicts of interest to declare.

## References

- Altangerel, N., Ariunbold, G.O., Gorman, C., Alkahtani, M.H., Borrego, E.J., Bohlmeier, D., et al. (2017) In vivo diagnostics of early abiotic plant stress response via Raman spectroscopy. *Proc. Natl. Acad. Sci. USA* 114: 3393–3396.
- Araus, J.L., Kefauver, S.C., Zaman-Allah, M., Olsen, M.S. and Cairns, J.E. (2018) Translating high-throughput phenotyping into genetic gain. *Trends Plant Sci.* 23: 451–466.
- Arvidsson, S., Pérez-Rodríguez, P. and Mueller-Roeber, B. (2011) A growth phenotyping pipeline for *Arabidopsis thaliana* integrating image analysis and rosette area modeling for robust quantification of genotype effects. *New Phytol.* 191: 895–907.
- Atkinson, J.A., Pound, M.P., Bennett, M.J. and Wells, D.M. (2019) Uncovering the hidden half of plants using new advances in root phenotyping. *Curr. Opin. Biotechnol.* 55: 1–8.



- Ben-Shlomo, Y. and Kuh, D. (2002) A life course approach to chronic disease epidemiology: conceptual models, empirical challenges and interdisciplinary perspectives. *Int. J. Epidemiol.* 31: 285–293.
- Berens, M.L., Wolinska, K.W., Spaepen, S., Ziegler, J., Nobori, T., Nair, A., et al. (2019) Balancing trade-offs between biotic and abiotic stress responses through leaf age-dependent variation in stress hormone cross-talk. *Proc. Natl. Acad. Sci. USA* 116: 2364–2373.
- Bishopp, A. and Lynch, J.P. (2015) The hidden half of crop yields. *Nat. Plants* 1: 15117.
- Bodner, G., Nakhforoosh, A., Arnold, T. and Leitner, D. (2018) Hyperspectral imaging: a novel approach for plant root phenotyping. *Plant Methods* 14: 84.
- Bray, A.L. and Topp, C.N. (2018) The quantitative genetic control of root architecture in maize. *Plant Cell Physiol.* 59: 1919–1930.
- Brügger, B. (2014) Lipidomics: analysis of the lipid composition of cells and subcellular organelles by electrospray ionization mass spectrometry. *Annu. Rev. Biochem.* 83: 79–98.
- Byun, S.-H., Sim, J.Y., Zhou, Z., Lee, J., Qazi, R., Walicki, M.C., et al. (2019) Mechanically transformative electronics, sensors, and implantable devices. *Sci. Adv.* 5: eaay0418.
- Caarls, L., Van der Does, D., Hickman, R., Jansen, W., Verk, M.C.V., Proietti, S., et al. (2016) Assessing the role of ETHYLENE RESPONSE FACTOR transcriptional repressors in salicylic acid-mediated suppression of jasmonic acid-responsive genes. *Plant Cell Physiol.* 58: 266–278.
- Cancer Genome Atlas Research Network (2013) The Cancer Genome Atlas Pan-Cancer analysis project. *Nat. Genet.* 45: 1113–1120.
- Chaudhary, K., Poirion, O.B., Lu, L. and Garmire, L.X. (2018) Deep learning-based multi-omics integration robustly predicts survival in liver cancer. *Clin. Cancer Res.* 24: 1248–1259.
- Chen, X., Schi Nberger, B., Menz, J. and Ludewig, U. (2018b) Plasticity of DNA methylation and gene expression under zinc deficiency in Arabidopsis roots. *Plant Cell Physiol.* 59: 1790–1802.
- Chen, J., Wang, J., Chen, W., Sun, W., Peng, M., Yuan, Z., et al. (2018a) Metabolome analysis of multi-connected biparental chromosome segment substitution line populations. *Plant Physiol.* 178: 612–625.
- Chen, W., Wang, W., Peng, M., Gong, L., Gao, Y., Wan, J., et al. (2016) Comparative and parallel genome-wide association studies for metabolic and agronomic traits in cereals. *Nat. Commun.* 7: 12767.
- Chun, H.J., Baek, D., Cho, H.M., Jung, H.S., Jeong, M.S., Jung, W.H., et al. (2019) Metabolic adjustment of Arabidopsis root suspension cells during adaptation to salt stress and mitotic stress memory. *Plant Cell Physiol.* 60: 612–625.
- Clauw, P., Coppens, F., De Beuf, K., Dhondt, S., Van Daele, T., Maleux, K., et al. (2015) Leaf responses to mild drought stress in natural variants of Arabidopsis. *Plant Physiol.* 167: 800–816.
- Crisp, P.A., Ganguly, D., Eichten, S.R., Borevitz, J.O. and Pogson, B.J. (2016) Reconsidering plant memory: Intersections between stress recovery, RNA turnover, and epigenetics. *Sci. Adv.* 2: e1501340.
- Cruz, J.A., Savage, L.J., Zegarac, R., Hall, C.C., Satoh-Cruz, M., Davis, G.A., et al. (2016) Dynamic environmental photosynthetic imaging reveals emergent phenotypes. *Cell Syst.* 2: 365–377.
- Czedik-Eysenberg, A., Seitner, S., Guldener, U., Koemed, S., Jez, J., Colombini, M., et al. (2018) The 'PhenoBox', a flexible, automated, open-source plant phenotyping solution. *New Phytol.* 219: 808–823.
- de Abreu, E.L.F., Li, K., Wen, W., Yan, J., Nikoloski, Z., Willmitzer, L., et al. (2018) Unraveling lipid metabolism in maize with time-resolved multi-omics data. *Plant J.* 93: 1102–1115.
- de Castro, A.I., Rallo, P., Suárez, M.P., Torres-Sánchez, J., Casanova, L., Jiménez-Brenes, F.M., et al. (2019) High-throughput system for the early quantification of major architectural traits in Olive Breeding Trials using UAV images and OBIA techniques. *Front Plant Sci.* 10: 1472.
- Delgado, A., Hays, D.B., Bruton, R.K., Ceballos, H., Novo, A., Boi, E., et al. (2017) Ground penetrating radar: a case study for estimating root bulk-ing rate in cassava (*Manihot esculenta* Crantz). *Plant Methods* 13: 65.
- Dhondt, S., Gonzalez, N., Blomme, J., De Milde, L., Van Daele, T., Van Akoley, D., et al. (2014) High-resolution time-resolved imaging of in vitro Arabidopsis rosette growth. *Plant J.* 80: 172–184.
- Dobrescu, A., Scorza, L.C.T., Tsaftaris, S.A. and McCormick, A.J. (2017) A "do-it-yourself" phenotyping system: measuring growth and morphology throughout the diel cycle in rosette shaped plants. *Plant Methods* 13: 95.
- Downie, H.F., Adu, M.O., Schmidt, S., Otten, W., Dupuy, L.X., White, P.J., et al. (2015) Challenges and opportunities for quantifying roots and rhizosphere interactions through imaging and image analysis. *Plant. Cell Environ.* 38: 1213–1232.
- Duenas, M.E., Klein, A.T., Alexander, L.E., Yandea-Nelson, M.D., Nikolau, B.J. and Lee, Y.J. (2017) High spatial resolution mass spectrometry imaging reveals the genetically programmed, developmental modification of the distribution of thylakoid membrane lipids among individual cells of maize leaf. *Plant J.* 89: 825–838.
- Eshel, A. and Beeckman, T. (2013) *Plant Roots: The Hidden Half*. CRC Press, Boca Raton, FL.
- Esser, B., Schnorr, J.M. and Swager, T.M. (2012) Selective detection of ethylene gas using carbon nanotube-based devices: utility in determination of fruit ripeness. *Angew. Chem. Int. Ed.* 51: 5752–5756.
- Fang, C. and Luo, J. (2019) Metabolic GWAS-based dissection of genetic bases underlying the diversity of plant metabolism. *Plant J.* 97: 91–100.
- Feng, H., Guo, Z., Yang, W., Huang, C., Chen, G., Fang, W., et al. (2017) An integrated hyperspectral imaging and genome-wide association analysis platform provides spectral and genetic insights into the natural variation in rice. *Sci. Rep.* 7: 4401.
- Fichman, Y. and Mittler, R. (2020) Rapid systemic signaling during abiotic and biotic stresses: Is the ROS wave master of all trades? *Plant J.* <https://onlinelibrary.wiley.com/doi/abs/10.1111/tbj.14685>.
- Fujita, M., Tanabata, T., Urano, K., Kikuchi, S. and Shinozaki, K. (2018) RIPPS: a plant phenotyping system for quantitative evaluation of growth under controlled environmental stress conditions. *Plant Cell Physiol.* 59: 2030–2038.
- Furbank, R.T., Jimenez-Berni, J.A., George-Jaeggli, B., Potgieter, A.B. and Deery, D.M. (2019) Field crop phenomics: enabling breeding for radiation use efficiency and biomass in cereal crops. *New Phytol.* 223: 1714–1727.
- Gao, F., Wang, W., Tan, M., Zhu, L., Zhang, Y., Fessler, E., et al. (2019) DeepCC: a novel deep learning-based framework for cancer molecular subtype classification. *Oncogenesis* 8: 44.
- Giraldo, J.P., Wu, H., Newkirk, G.M. and Kruss, S. (2019) Nanobiotechnology approaches for engineering smart plant sensors. *Nat. Nanotechnol.* 14: 541–553.
- Goldfeder, R.L., Wall, D.P., Khoury, M.J., Ioannidis, J.P.A. and Ashley, E.A. (2017) Human genome sequencing at the population scale: a primer on high-throughput DNA sequencing and analysis. *Am. J. Epidemiol.* 186: 1000–1009.
- Granier, C., Aguirrezabal, L., Chenu, K., Cookson, S.J., Dauzat, M., Hamard, P., et al. (2006) PHENOPSIS, an automated platform for reproducible phenotyping of plant responses to soil water deficit in *Arabidopsis thaliana* permitted the identification of an accession with low sensitivity to soil water deficit. *New Phytol.* 169: 623–635.
- Halfon, N. and Forrest, C.B. (2018) The emerging theoretical framework of life course health development. In *Handbook of Life Course Health Development*. Edited by Halfon, N., Forrest, C.B., Lerner, R.M. and Faustman, E.M. pp. 19–43. Springer International Publishing, Cham.
- Han, S.T., Peng, H., Sun, Q., Venkatesh, S., Chung, K.S., Lau, S.C., et al. (2017) An overview of the development of flexible sensors. *Adv. Mater.* 29: 1700375.
- Hanson, M.A. and Gluckman, P.D. (2014) Early developmental conditioning of later health and disease: physiology or pathophysiology? *Physiol. Rev.* 94: 1027–1076.
- Hara, S., Matsuda, M. and Minamisawa, K. (2019) Growth stage-dependent bacterial communities in soybean plant tissues: methylorubrum



- transiently dominated in the flowering stage of the soybean shoot. *Microb. Environ.* 34: 446–450.
- Hasin, Y., Seldin, M. and Lusis, A. (2017) Multi-omics approaches to disease. *Genome Biol.* 18: 83.
- Haugen, A.C., Schug, T.T., Collman, G. and Heindel, J.J. (2015) Evolution of DOHaD: the impact of environmental health sciences. *J. Dev. Orig. Health Dis.* 6: 55–64.
- Hirsch, C.N., Foerster, J.M., Johnson, J.M., Sekhon, R.S., Muttoni, G., Vaillancourt, B., et al. (2014) Insights into the maize pan-genome and pan-transcriptome. *Plant Cell* 26: 121–135.
- Horn, P.J. and Benning, C. (2016) The plant lipidome in human and environmental health. *Science* 353: 1228–1232.
- Huang, S., Chaudhary, K. and Garmire, L.X. (2017) More is better: recent progress in multi-omics data integration methods. *Front. Genet.* 8: 84.
- Huang, X.Y. and Salt, D.E. (2016) Plant ionomics: from elemental profiling to environmental adaptation. *Mol. Plant* 9: 787–797.
- Huang, H., Su, S., Wu, N., Wan, H., Wan, S., Bi, H., et al. (2019) Graphene-based sensors for human health monitoring. *Front. Chem.* 7: 399.
- Humplik, J.F., Lazar, D., Husickova, A. and Spichal, L. (2015) Automated phenotyping of plant shoots using imaging methods for analysis of plant stress responses—a review. *Plant Methods* 11: 29.
- Itoh, H., Tanaka, Y. and Izawa, T. (2019) Genetic relationship between phytochromes and OsELF3–1 reveals the mode of regulation for the suppression of phytochrome signaling in rice. *Plant Cell Physiol.* 60: 549–561.
- Jiang, N., Floro, E., Bray, A.L., Laws, B., Duncan, K.E. and Topp, C.N. (2019) Three-dimensional time-lapse analysis reveals multiscale relationships in maize root systems with contrasting architectures. *Plant Cell* 31: 1708–1722.
- Jiang, Y., Li, C., Robertson, J.S., Sun, S., Xu, R. and Paterson, A.H. (2018) GPhenoVision: a ground mobile system with multi-modal imaging for field-based high throughput phenotyping of cotton. *Sci. Rep.* 8: 1213.
- Kalinin, A.A., Higgins, G.A., Reamaroon, N., Soroushmehr, S., Allyn-Feuer, A., Dinov, I.D., et al. (2018) Deep learning in pharmacogenomics: from gene regulation to patient stratification. *Pharmacogenomics* 19: 629–650.
- Kanakasabapathy, M.K., Sadasivam, M., Singh, A., Preston, C., Thirumalaraju, P., Venkataraman, M., et al. (2017) An automated smartphone-based diagnostic assay for point-of-care semen analysis. *Sci. Transl. Med.* 9: eaai7863.
- Kawakatsu, T., Huang, S.C., Jupe, F., Sasaki, E., Schmitz, R.J., Urich, M.A., et al. (2016) Epigenomic diversity in a global collection of *Arabidopsis thaliana* accessions. *Cell* 166: 492–505.
- Kim, J.J., Allison, L.K. and Andrew, T.L. (2019) Vapor-printed polymer electrodes for long-term, on-demand health monitoring. *Sci. Adv.* 5: eaaw0463.
- Klukas, C., Chen, D. and Pape, J.-M. (2014) Integrated analysis platform: an open-source information system for high-throughput plant phenotyping. *Plant Physiol.* 165: 506–518.
- Koda, S., Onda, Y., Matsui, H., Takahagi, K., Uehara-Yamaguchi, Y., Shimizu, M., et al. (2017) Diurnal transcriptome and gene network represented through sparse modeling in *Brachypodium distachyon*. *Front. Plant Sci.* 8: 2055.
- Koshiba, S., Motoike, I., Saigusa, D., Inoue, J., Shiota, M., Katoh, Y., et al. (2018) Omics research project on prospective cohort studies from the Tohoku Medical Megabank Project. *Genes Cells* 23: 406–417.
- Kourou, K., Exarchos, T.P., Exarchos, K.P., Karamouzis, M.V. and Fotiadis, D.I. (2015) Machine learning applications in cancer prognosis and prediction. *Comput. Struct. Biotechnol. J.* 13: 8–17.
- Koydemir, H.C. and Ozcan, A. (2018) Wearable and implantable sensors for biomedical applications. *Annu. Rev. Anal. Chem.* 11: 127–146.
- Kuh, D. and Ben-Shlomo, Y. (2004) *A Life Course Approach to Chronic Disease Epidemiology*. P. 473. Oxford University Press, New York.
- Kuh, D., Ben-Shlomo, Y., Lynch, J., Hallqvist, J. and Power, C. (2003) Life course epidemiology. *J. Epidemiol. Community Health* 57: 778–783.
- Lee, L.R., Wengier, D.L. and Bergmann, D.C. (2019) Cell-type-specific transcriptome and histone modification dynamics during cellular reprogramming in the *Arabidopsis* stomatal lineage. *Proc. Natl. Acad. Sci. USA* 116: 21914–21924.
- Li, Z., Paul, R., Ba Tis, T., Saville, A.C., Hansel, J.C., Yu, T., et al. (2019b) Non-invasive plant disease diagnostics enabled by smartphone-based fingerprinting of leaf volatiles. *Nat. Plants* 5: 856–866.
- Li, K., Wen, W., Alseekh, S., Yang, X., Guo, H., Li, W., et al. (2019a) Large-scale metabolite quantitative trait locus analysis provides new insights for high-quality maize improvement. *Plant J.* 99: 216–230.
- Lien, M.R., Barker, R.J., Ye, Z., Westphall, M.H., Gao, R., Singh, A., et al. (2019) A low-cost and open-source platform for automated imaging. *Plant Methods* 15: 6.
- Ling, W., Liew, G., Li, Y., Hao, Y., Pan, H., Wang, H., et al. (2018) Materials and techniques for implantable nutrient sensing using flexible sensors integrated with metal–organic frameworks. *Adv. Mater.* 30: 1800917.
- Llorens-Rico, V. and Raes, J. (2019) Tracking humans and microbes. *Nature* 569: 632–633.
- López-Granados, F., Torres-Sánchez, J., Jiménez-Brenes, F.M., Arquero, O., Lovera, M. and de Castro, A.I. (2019) An efficient RGB-UAV-based platform for field almond tree phenotyping: 3-D architecture and flowering traits. *Plant Methods* 15: 160.
- Luo, J. (2015) Metabolite-based genome-wide association studies in plants. *Curr. Opin. Plant Biol.* 24: 31–38.
- Ma, L., Shi, Y., Siemianowski, O., Yuan, B., Egner, T.K., Mirnezami, S.V., et al. (2019) Hydrogel-based transparent soils for root phenotyping in vivo. *Proc. Natl. Acad. Sci. USA* 116: 11063–11068.
- Madathil, S., Joseph, L., Hardy, R., Rousseau, M.C. and Nicolau, B. (2018) A Bayesian approach to investigate life course hypotheses involving continuous exposures. *Int. J. Epidemiol.* 47: 1623–1635.
- Masuda, K., Akagi, T., Esumi, T. and Tao, R. (2020) Epigenetic flexibility underlies somaclonal sex conversions in hexaploid persimmon. *Plant Cell Physiol.* 61: 393–402.
- Milner, S.G., Jost, M., Taketa, S., Mazon, E.R., Himmelbach, A., Oppermann, M., et al. (2019) Genebank genomics highlights the diversity of a global barley collection. *Nat. Genet.* 51: 319–326.
- Minervini, M., Giuffrida, M.V., Perata, P. and Tsafaris, S.A. (2017) Phenotiki: an open software and hardware platform for affordable and easy image-based phenotyping of rosette-shaped plants. *Plant J.* 90: 204–216.
- Mishra, B., Kumar, N. and Mukhtar, M.S. (2019) Systems biology and machine learning in plant–pathogen interactions. *Mol. Plant Microbe Interact.* 32: 45–55.
- Mochida, K., Koda, S., Inoue, K., Hirayama, T., Tanaka, S., Nishii, R., et al. (2019) Computer vision-based phenotyping for improvement of plant productivity: a machine learning perspective. *GigaScience* 8: giv153.
- Mochida, K., Saisho, D. and Hirayama, T. (2015) Crop improvement using life cycle datasets acquired under field conditions. *Front. Plant Sci.* 6: 6.
- Mochida, K. and Shinozaki, K. (2010) Genomics and bioinformatics resources for crop improvement. *Plant Cell Physiol.* 51: 497–523.
- Mochida, K. and Shinozaki, K. (2011) Advances in omics and bioinformatics tools for systems analyses of plant functions. *Plant Cell Physiol.* 52: 2017–2038.
- Moon, M. and Nakai, K. (2018) Integrative analysis of gene expression and DNA methylation using unsupervised feature extraction for detecting candidate cancer biomarkers. *J. Bioinform. Comput. Biol.* 16: 1850006.
- Nagano, A.J., Kawagoe, T., Sugisaka, J., Honjo, M.N., Iwayama, K. and Kudoh, H. (2019) Annual transcriptome dynamics in natural environments reveals plant seasonal adaptation. *Nat. Plants* 5: 74–83.
- Nakamura, Y. (2018) Membrane lipid oscillation: an emerging system of molecular dynamics in the plant membrane. *Plant Cell Physiol.* 59: 441–447.
- Nam, Y.-J., Herman, D., Blomme, J., Chae, E., Kojima, M., Coppens, F., et al. (2017) Natural variation of molecular and morphological gibberellin responses. *Plant Physiol.* 173: 703–714.

- Neveu, P., Tireau, A., Hilgert, N., Nègre, V., Mineau-Cesari, J., Brichet, N., et al. (2019) Dealing with multi-source and multi-scale information in plant phenomics: the ontology-driven Phenotyping Hybrid Information System. *New Phytol.* 221: 588–601.
- Nightingale, A.M., Leong, C.L., Burnish, R.A., Hassan, S.U., Zhang, Y., Clough, G.F., et al. (2019) Monitoring biomolecule concentrations in tissue using a wearable droplet microfluidic-based sensor. *Nat. Commun.* 10: 2741.
- Oenel, A., Fekete, A., Krischke, M., Faul, S.C., Gresser, G., Havaux, M., et al. (2017) Enzymatic and non-enzymatic mechanisms contribute to lipid oxidation during seed aging. *Plant Cell Physiol.* 58: 925–933.
- Ohnishi, N., Wacera, W.F. and Sakamoto, W. (2019) Photosynthetic responses to high temperature and strong light suggest potential post-flowering drought tolerance of sorghum Japanese Landrace Takakibi. *Plant Cell Physiol.* 60: 2086–2099.
- Oren, S., Ceylan, H., Schnable, P.S. and Dong, L. (2017) High-resolution patterning and transferring of graphene-based nanomaterials onto tape toward roll-to-roll production of tape-based wearable sensors. *Adv. Mater. Technol.* 2: 1700223.
- Park, J., Kim, J., Kim, K., Kim, S.Y., Cheong, W.H., Park, K., et al. (2016) Wearable, wireless gas sensors using highly stretchable and transparent structures of nanowires and graphene. *Nanoscale* 8: 10591–10597.
- Park, J., Kim, J., Kim, S.Y., Cheong, W.H., Jang, J., Park, Y.G., et al. (2018) Soft, smart contact lenses with integrations of wireless circuits, glucose sensors, and displays. *Sci. Adv.* 4: eaap9841.
- Pastor, A.V., Palazzo, A., Havlik, P., Biemans, H., Wada, Y., Obersteiner, M., et al. (2019) The global nexus of food–trade–water sustaining environmental flows by 2050. *Nat. Sustain.* 2: 499–507.
- Paulus, S. (2019) Measuring crops in 3D: using geometry for plant phenotyping. *Plant Methods* 15: 103.
- Pena-Bahamonde, J., Nguyen, H.N., Fanourakis, S.K. and Rodrigues, D.F. (2018) Recent advances in graphene-based biosensor technology with applications in life sciences. *J. Nanobiotechnol.* 16: 75.
- Pérez-Bueno, M.L., Pineda, M. and Barón, M. (2019) Phenotyping plant responses to biotic stress by chlorophyll fluorescence imaging. *Front. Plant Sci.* 10: 1135.
- Perlikowski, D., Augustyniak, A., Skirycz, A., Pawłowicz, I., Masajada, K., Michaelis, I.N., et al. (2020) Efficient root metabolism improves drought resistance of *Festuca arundinacea*. *Plant Cell Physiol.* 61: 492–504.
- Ployet, R., Veneziano Labate, M.T., Regiani Cataldi, T., Christina, M., Morel, M., San Clemente, H., et al. (2019) A systems biology view of wood formation in *Eucalyptus grandis* trees submitted to different potassium and water regimes. *New Phytol.* 223: 766–782.
- Qiu, Q., Sun, N., Bai, H., Wang, N., Fan, Z., Wang, Y., et al. (2019) Field-based high-throughput phenotyping for maize plant using 3D LiDAR point cloud generated with a “phenomobile”. *Front. Plant Sci.* 10: 554.
- Raman, A.S., Gehrig, J.L., Venkatesh, S., Chang, H.W., Hibberd, M.C., Subramanian, S., et al. (2019) A sparse covarying unit that describes healthy and impaired human gut microbiota development. *Science* 365: eaau4735.
- Ramirez-Flores, M.R., Rellan-Alvarez, R.N., Wozniak, B., Gebreselassie, M.-N., Jakobsen, I., Olalde-Portugal, V.C., et al. (2017) Co-ordinated changes in the accumulation of metal ions in maize (*Zea mays* ssp. *mays* L.) in response to inoculation with the arbuscular mycorrhizal fungus *Funneliformis mosseae*. *Plant Cell Physiol.* 58: 1689–1699.
- Reynolds, D., Baret, F., Welcker, C., Bostrom, A., Ball, J., Cellini, F., et al. (2019) What is cost-efficient phenotyping? Optimizing costs for different scenarios. *Plant Sci.* 282: 14–22.
- Rohart, F., Gautier, B., Singh, A. and Le Cao, K.A. (2017) mixOmics: an R package for omics feature selection and multiple data integration. *PLoS Comput. Biol.* 13: e1005752.
- Ruffel, S. (2018) Nutrient-related long-distance signals: common players and possible cross-talk. *Plant Cell Physiol.* 59: 1723–1732.
- Russell, J., Mascher, M., Dawson, I.K., Kyriakidis, S., Calixto, C., Freund, F., et al. (2016) Exome sequencing of geographically diverse barley landraces and wild relatives gives insights into environmental adaptation. *Nat. Genet.* 48: 1024–1030.
- Ryan, P.R., Delhaize, E., Watt, M. and Richardson, A.E. (2016) Plant roots: understanding structure and function in an ocean of complexity. *Ann. Bot.* 118: 555–559.
- Ryu, K.H., Huang, L., Kang, H.M. and Schiefelbein, J. (2019) Single-cell RNA sequencing resolves molecular relationships among individual plant cells. *Plant Physiol.* 179: 1444–1456.
- Scott, R.H., Fowler, T.A. and Caulfield, M. (2019) Genomic medicine: time for health-care transformation. *Lancet* 394: 454–456.
- Šebela, D., Quiñones, C., Cruz, C.V., Ona, I., Olejníčková, J. and Jagadish, K.S. (2018) Chlorophyll fluorescence and reflectance-based non-invasive quantification of blast, bacterial blight and drought stresses in rice. *Plant Cell Physiol.* 59: 30–43.
- Shu, K., Luo, X., Meng, Y. and Yang, W. (2018) Toward a molecular understanding of abscisic acid actions in floral transition. *Plant Cell Physiol.* 59: 215–221.
- Stark, Z., Dolman, L., Manolio, T.A., Ozenberger, B., Hill, S.L., Caulfield, M.J., et al. (2019) Integrating genomics into healthcare: a global responsibility. *Am. J. Hum. Genet.* 104: 13–20.
- Sugita, R., Kobayashi, N.I., Hirose, A., Saito, T., Iwata, R., Tanoi, K., et al. (2016) Visualization of uptake of mineral elements and the dynamics of photosynthates in *Arabidopsis* by a newly developed real-time radioisotope imaging system (RRIS). *Plant Cell Physiol.* 57: 743–753.
- Takanashi, K., Nakagawa, Y., Aburaya, S., Kaminade, K., Aoki, W., Saida-Munakata, Y., et al. (2019) Comparative proteomic analysis of *Lithospermum erythrorhizon* reveals regulation of a variety of metabolic enzymes leading to comprehensive understanding of the shikonin biosynthetic pathway. *Plant Cell Physiol.* 60: 19–28.
- Tardieu, F., Cabrera-Bosquet, L., Pridmore, T. and Bennett, M. (2017) Plant phenomics, from sensors to knowledge. *Curr. Biol.* 27: R770–R783.
- The 1001 Genomes Consortium (2016) 1,135 genomes reveal the global pattern of polymorphism in *Arabidopsis thaliana*. *Cell* 166: 481–491.
- Tohge, T. and Fernie, A.R. (2015) Metabolomics-inspired insight into developmental, environmental and genetic aspects of tomato fruit chemical composition and quality. *Plant Cell Physiol.* 56: 1681–1696.
- Toju, H., Peay, K.G., Yamamichi, M., Narisawa, K., Hiruma, K., Naito, K., et al. (2018) Core microbiomes for sustainable agroecosystems. *Nat. Plants* 4: 247–257.
- Torii, K., Kubota, A., Araki, T. and Endo, M. (2020) Time-series single-cell RNA-seq data reveal auxin fluctuation during endocycle. *Plant Cell Physiol.* 61: 243–254.
- Tovar, J.C., Hoyer, J.S., Lin, A., Tielking, A., Callen, S.T., Elizabeth Castillo, S., et al. (2018) Raspberry Pi-powered imaging for plant phenotyping. *Appl. Plant Sci.* 6: e1031.
- van Bezouw, R.F.H.M., Keurentjes, J.J.B., Harbinson, J. and Aarts, M.G.M. (2018) Converging phenomics and genomics to study natural variation in plant photosynthetic efficiency. *Plant J.* 97: 112–133.
- van Dusschoten, D., Metzner, R., Kochs, J., Postma, J.A., Pflugfelder, D., Bühler, J., et al. (2016) Quantitative 3D analysis of plant roots growing in soil using magnetic resonance imaging. *Plant Physiol.* 170: 1176–1188.
- Vashist, S.K., van Oordt, T., Schneider, E.M., Zengerle, R., von Stetten, F. and Luong, J.H. (2015) A smartphone-based colorimetric reader for bioanalytical applications using the screen-based bottom illumination provided by gadgets. *Biosens. Bioelectron.* 67: 248–255.
- Vijayan, P., Willick, I.R., Lahlali, R., Karunakaran, C. and Tanino, K.K. (2015) Synchrotron radiation sheds fresh light on plant research: the use of powerful techniques to probe structure and composition of plants. *Plant Cell Physiol.* 56: 1252–1263.
- Von Bertalanffy, L. (1950) The theory of open systems in physics and biology. *Science* 111: 23–29.
- Wang, W., Mauleon, R., Hu, Z., Chebotarov, D., Tai, S., Wu, Z., et al. (2018a) Genomic variation in 3,010 diverse accessions of Asian cultivated rice. *Nature* 557: 43–49.

- Wang, X., Singh, D., Marla, S., Morris, G. and Poland, J. (2018b) Field-based high-throughput phenotyping of plant height in sorghum using different sensing technologies. *Plant Methods* 14: 53.
- Wang, P., Yamaji, N., Inoue, K., Mochida, K. and Ma, J.F. (2020) Plastic transport systems of rice for mineral elements in response to diverse soil environmental changes. *New Phytol.* 226: 156–169.
- Warrington, N.M., Beaumont, R.N., Horikoshi, M., Day, F.R., Helgeland, O., Laurin, C., et al. (2019) Maternal and fetal genetic effects on birth weight and their relevance to cardio-metabolic risk factors. *Nat. Genet.* 51: 804–814.
- Wasson, A.P., Nagel, K.A., Tracy, S. and Watt, M. (2020) Beyond digging: noninvasive root and rhizosphere phenotyping. *Trends Plant Sci.* 25: 119–120.
- Way, G.P., Sanchez-Vega, F., La, K., Armenia, J., Chatila, W.K., Luna, A., et al. (2018) Machine learning detects pan-cancer RAS pathway activation in the Cancer Genome Atlas. *Cell Rep.* 23: 172–180.e173.
- Wei, Z., Gu, Y., Friman, V.P., Kowalchuk, G.A., Xu, Y., Shen, Q., et al. (2019) Initial soil microbiome composition and functioning predetermine future plant health. *Sci. Adv.* 5: eaaw0759.
- Withers, J. and Dong, X. (2017) Post-translational regulation of plant immunity. *Curr. Opin. Plant Biol.* 38: 124–132.
- Xing, L., Li, Y., Qi, S., Zhang, C., Ma, W., Zuo, X., et al. (2019) Comparative RNA-sequencing and DNA methylation analyses of apple (*Malus domestica* Borkh.) buds with diverse flowering capabilities reveal novel insights into the regulatory mechanisms of flower bud formation. *Plant Cell Physiol.* 60: 1702–1721.
- Yang, W., Duan, L., Chen, G., Xiong, L. and Liu, Q. (2013) Plant phenomics and high-throughput phenotyping: accelerating rice functional genomics using multidisciplinary technologies. *Curr. Opin. Plant Biol.* 16: 180–187.
- Yang, T., Lv, R., Li, J., Lin, H. and Xi, D. (2018) Phytochrome A and B negatively regulate salt stress tolerance of *Nicotiana tobacum* via ABA–jasmonic acid synergistic cross-talk. *Plant Cell Physiol.* 59: 2381–2393.
- Zhao, Y., Gao, S., Zhu, J., Li, J., Xu, H., Xu, K., et al. (2019) Multifunctional stretchable sensors for continuous monitoring of long-term leaf physiology and microclimate. *ACS Omega* 4: 9522–9530.
- Zhou, Z., Jiang, Y., Wang, Z., Gou, Z., Lyu, J., Li, W., et al. (2015) Resequencing 302 wild and cultivated accessions identifies genes related to domestication and improvement in soybean. *Nat. Biotechnol.* 33: 408–414.
- Zhou, W., Sailani, M.R., Contrepolis, K., Zhou, Y., Ahadi, S., Leopold, S.R., et al. (2019) Longitudinal multi-omics of host-microbe dynamics in prediabetes. *Nature* 569: 663–671.
- Zuo, T. and Ng, S.C. (2018) The gut microbiota in the pathogenesis and therapeutics of inflammatory bowel disease. *Front. Microbiol.* 9: 2247.
